# Supplementary material for: Application of Skyline for Analysis of Protein–Protein Interactions In Vivo
Source: Molecules. 2021 Nov 26;26(23):7170. doi: 10.3390/molecules26237170 (PMC8658920; doi:10.3390/molecules26237170)
Supplement: Supplementary file 1 [file molecules-26-07170-s001.zip › Supplementary data 2.xlsx]

## Sheet: Лист1
	Table S1. Calculation of corrected biotinylation levels
						Biotinylated BAP	Multiply on relative ionization coefficient	Recalculation after normalization
Replicate	Precursor Peak Found Ratio	Best Retention Time	Max Fwhm	Min Start Time	Max End Time	Total Area				Mean	St.dev
0-3h (BAP-GFP+BirA-Oct4), 3h biotin labeling	1	39.33	0.39	39.16	39.67	95386	1.13509e+06	811420	0-3	1.35225e+06	860791			0-3	1.35225e+06
0'-3h (BAP-GFP+BirA-Oct4), 3h biotin labeling	1	39.57	0.38	38.72	39.71	121845	1.44996e+06	900459						1-3	1.16497e+08
0''-3h (BAP-GFP+BirA-Oct4), 3h biotin labeling	0.5	43.65	1.26	39.52	43.99	25166	299475	2.34488e+06						0-9	1.86594e+06
1-3h (BAP-Sox2+BirA-Oct4), 3h biotin labeling	1	39.43	0.31	39.02	40.05	49253320	586114508	1.10165e+08	1-3	1.16497e+08	6.16177e+06			1-9	1.32118e+08
1'-3h (BAP-Sox2+BirA-Oct4), 3h biotin labeling	1	39.5	0.33	39.09	40.08	92322224	1.09863e+09	1.16852e+08
1''-3h (BAP-Sox2+BirA-Oct4), 3h biotin labeling	1	39.41	1.52	38.5	42.13	18415614	2.19146e+08	1.22473e+08
0-9h (BAP-GFP+BirA-Oct4), 9h biotin labeling	1	39.5	0.34	39.05	39.91	517561	6.15898e+06	2.04105e+06	0-9	1.86594e+06	571739
0'-9h (BAP-GFP+BirA-Oct4), 9h biotin labeling	1	38.71	0.35	38.41	39.09	313931	3.73578e+06	1.22712e+06
0''-9h (BAP-GFP+BirA-Oct4), 9h biotin labeling	1	42.37	3.94	36.35	43.23	81826	973729	2.32964e+06
1-9h (BAP-Sox2+BirA-Oct4), 9h biotin labeling	1	38.51	0.32	38.17	39.13	124237048	1.47842e+09	1.36748e+08	1-9	1.32118e+08	8.68222e+06
1'-9h (BAP-Sox2+BirA-Oct4), 9h biotin labeling	1	38.61	0.34	38.24	39.26	137505072	1.63631e+09	137505072
1''-9h (BAP-Sox2+BirA-Oct4), 9h biotin labeling	1	38.38	1.39	37.38	40.86	9105072	1.0835e+08	1.22103e+08
						Propionylated BAP	Total amount of BAP	Normalization
Replicate	Precursor Peak Found Ratio	Best Retention Time	Max Fwhm	Min Start Time	Max End Time	Total Area
0-3h (BAP-GFP+BirA-Oct4), 3h biotin labeling	1	37.37	0.39	36.92	38.08	203704368	2.04839e+08	1.74251e+09
0'-3h (BAP-GFP+BirA-Oct4), 3h biotin labeling	1	37.43	0.39	36.96	38.15	234335840	2.35786e+08	1.7425e+09
0''-3h (BAP-GFP+BirA-Oct4), 3h biotin labeling	1	38.48	1.21	38.05	40.45	18401856	1.87013e+07	1.74252e+09
1-3h (BAP-Sox2+BirA-Oct4), 3h biotin labeling	1	37.5	0.4	36.99	38.19	192960304	779074812	1.74256e+09
1'-3h (BAP-Sox2+BirA-Oct4), 3h biotin labeling	1	37.54	0.42	36.96	38.29	278056448	1.37669e+09	1.74248e+09
1''-3h (BAP-Sox2+BirA-Oct4), 3h biotin labeling	1	37.48	1.29	36.79	39.48	42868132	2.62014e+08	1.74252e+09
0-9h (BAP-GFP+BirA-Oct4), 9h biotin labeling	1	37.53	0.42	37.09	38.32	435699424	4.41858e+08	1.74251e+09
0'-9h (BAP-GFP+BirA-Oct4), 9h biotin labeling	1	36.78	0.41	36.34	37.53	442050016	4.45786e+08	1.74253e+09
0''-9h (BAP-GFP+BirA-Oct4), 9h biotin labeling	1	37.49	1.19	35.52	39.56	60230312	6.1204e+07	1.74252e+09
1-9h (BAP-Sox2+BirA-Oct4), 9h biotin labeling	1	36.68	0.36	36.07	37.71	104665544	1.58309e+09	1.7425e+09
1'-9h (BAP-Sox2+BirA-Oct4), 9h biotin labeling	1	36.71	0.37	36.2	37.4	106214168	1.74252e+09	1.74252e+09
1''-9h (BAP-Sox2+BirA-Oct4), 9h biotin labeling	1	36.63	1.19	35.69	38.59	21587366	1.29938e+08	1.74252e+09
